# Supplementary material for: Determinants Of Oral corticosteroid Responsiveness in Wheezing Asthmatic Youth (DOORWAY): protocol for a prospective multicentre cohort study of children with acute moderate-to-severe asthma exacerbations
Source: HighWire-hosted journal article supplement (doi:10.1136/bmjopen-2013-004699), 2014-04-01
Supplement: bmjopen-2013-004699supp_figure.pdf [file bmjopen-2013-004699supp_figure.pdf]

| Paediatric Respiratory Assessment Measure (PRAM) | Oral corticosteroids §                                                                                                                                | Inhaled salbutamol †<br>100 mcg/puff                                                                                                                                                   | Inhaled ipratropium bromide<br>21 mcg/puff †                                                                 |
|--------------------------------------------------|-------------------------------------------------------------------------------------------------------------------------------------------------------|----------------------------------------------------------------------------------------------------------------------------------------------------------------------------------------|--------------------------------------------------------------------------------------------------------------|
| <b>Within initial 60 ± 15 minutes of triage</b>  |                                                                                                                                                       |                                                                                                                                                                                        |                                                                                                              |
| <b>MODERATE ASTHMA</b><br>PRAM 4-7               | <b>Drug:</b> Prednisone or prednisolone 2mg/kg, max: 50 mg*<br><b>Timing:</b> after 1 <sup>st</sup> salbutamol (and ipratropium bromide if indicated) | <b>Delivery device:</b> MDI (or nebulizer)<br><b>Dose:</b> 0.3 puffs/kg of 100 ug/puff (max 10 puffs) (or 0.3 mL/kg of 5% salbutamol solution)<br><b>Frequency:</b> q 20 to 30 minutes | <b>Not recommended</b>                                                                                       |
| <b>SEVERE ASTHMA</b><br>PRAM >7                  | As above                                                                                                                                              | <b>MDI and dose :</b> as above<br><b>Frequency:</b> q 20 minutes                                                                                                                       | <b>Delivery device:</b> MDI (or nebulizer)<br><b>Dose:</b> 3 puffs (or 250 ug)<br><b>Frequency:</b> q 20 min |
| <b>Beyond initial 60 minutes until discharge</b> |                                                                                                                                                       |                                                                                                                                                                                        |                                                                                                              |
| PRAM 4-7                                         | —                                                                                                                                                     | As above<br>q 30-60 minutes                                                                                                                                                            |                                                                                                              |
| PRAM >7                                          | —                                                                                                                                                     | As above<br>q 30 to 60 minutes                                                                                                                                                         |                                                                                                              |
| <b>At discharge</b>                              |                                                                                                                                                       |                                                                                                                                                                                        |                                                                                                              |
|                                                  | Prednisone or prednisolone 1mg/kg x 4 days, max: 50 mg*                                                                                               | 2-4 puffs q 4 to 6 hours as needed                                                                                                                                                     |                                                                                                              |

\* Administered as prednisone 5 (or 50mg) or prednisolone 1 mg/mL solution

† Administered via age-appropriate valve spacer

§ If patient vomits, use oral dexamethasone 0.15-0.30 mg/kg per dose of parenteral solution (max 10 mg)

If impending respiratory failure, use methylprednisolone 1-2mg/kg (max 80 mg) or hydrocortisone 4-8 mg/kg (max 400 mg)
